# Supplementary material for: Antenatal Corticosteroids in Diabetic Pregnancies and Outcomes of Very Preterm Infants: a National Multicenter Cohort Study
Source: Research Square preprint supplement (doi:10.21203/rs.3.rs-7107543/v1), 2025-07-25

Supplement table 1. Differences in mortality and morbidity between very preterm infants born to diabetic mothers with and without ACS

exposure in the CHNN, 2019-2021, stratified by course of corticosteroids (Excluded infants with data missing of ACS course).

Single complete

course ≤ 7 days

(n = 1394)

Single complete

course > 7 days

(n = 1146)

Partial course

Repeat courses

(n = 474)

(n = 475)

n (%)

104 (21.94)

295 (21.16)

282 (24.61)

102 (21.47)

Mortality or any severe

morbidity

OR (95% CI)

aOR (95% CI)

n (%)

0.65 (0.49, 0.85)

0.64 (0.48, 0.86)

33 (6.96)

0.62 (0.50, 0.76)

0.60 (0.48, 0.75)

102 (7.32)

0.75 (0.61, 0.92)

0.72 (0.59, 0.90)

116 (10.12)

0.63 (0.48, 0.82)

0.66 (0.49, 0.88)

24 (5.05)

Mortality in hospital

OR (95% CI)

aOR (95% CI)

n (%)

0.50 (0.33, 0.76)

0.46 (0.29, 0.74)

77 (16.35)

0.53 (0.39, 0.71)

0.49 (0.35, 0.68)

216 (15.54)

0.76 (0.57, 1.01)

0.73 (0.53, 1.01)

224 (19.75)

0.36 (0.22, 0.57)

0.37 (0.22, 0.61)

68 (14.38)

Severe bronchopulmonary

dysplasia

OR (95% CI)

aOR (95% CI)

n (%)

0.67 (0.50, 0.90)

0.66 (0.45, 0.91)

5 (1.05)

0.63 (0.50, 0.79)

0.60 (0.47, 0.78)

22 (1.58)

0.84 (0.67, 1.06)

0.83 (0.65, 1.07)

12 (1.05)

0.57 (0.42, 0.78)

0.61 (0.43, 0.85)

5 (1.05)

Surgical necrotizing

enterocolitis

OR (95% CI)

aOR (95% CI)

0.45 (0.16, 1.22)

0.47 (0.17, 1.31)

0.67 (0.36, 1.28)

0.76 (0.39, 1.46)

0.45 (0.21, 0.94)

0.47 (0.22, 0.99)

0.48 (0.16, 1.22)

0.48 (0.17, 1.33)


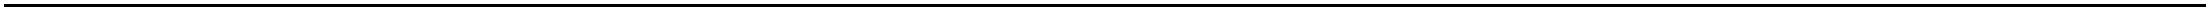

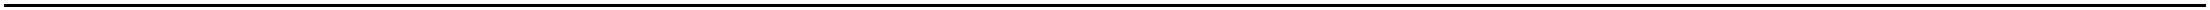


n (%)

16 (3.38)

57 (4.09)

52 (4.54)

22 (4.63)

Intraventricular

hemorrhage > II or

periventricular leukomalacia

OR (95% CI)

aOR (95% CI)

n (%)

0.59 (0.33,1.06)

0.68 (0.37,1.25)

47 (9.92)

0.72 (0.48, 1.09)

0.78 (0.51, 1.19)

165 (11.84)

0.80 (0.53, 1.22)

0.83 (0.54, 1.28)

186 (16.23)

0.82 (0.48,1.39)

0.96 (0.56,1.67)

54 (11.37)

Low Apgar score (1-minute ≤ 3

or 5-minute ≤ 7)

OR (95% CI)

aOR (95% CI)

n (%)

0.51 (0.36, 0.73)

0.53 (0.36, 0.77)

249 (52.53)

0.62 (0.48, 0.80)

0.61 (0.47, 0.80)

714 (51.22)

0.90 (0.70, 1.15)

0.93 (0.72, 1.20)

646 (56.37)

0.59 (0.42, 0.84)

0.70 (0.49, 0.99)

264 (55.58)

Respiratory distress syndrome

OR (95% CI)

aOR (95% CI)

n (%)

0.76 (0.61, 0.97)

0.74 (0.58, 0.95)

210 (44.30)

0.73 (0.61, 0.87)

0.72 (0.59, 0.88)

535 (38.38)

0.89 (0.74, 1.08)

0.88 (0.72, 1.08)

534 (46.60)

0.86 (0.68, 1.09)

0.81 (0.63, 1.04)

208 (43.79)

Need invasive ventilation in

hospital

OR (95% CI)

aOR (95% CI)

n (%)

0.68 (0.54, 0.85)

0.67 (0.52, 0.86)

12 (2.53)

0.53 (0.44, 0.63)

0.48 (0.39, 0.58)

44 (3.16)

0.74 (0.62, 0.89)

0.71 (0.58, 0.86)

36 (3.14)

0.66 (0.52, 0.83)

0.64 (0.50, 0.83)

8 (1.68)

Treated retinopathy of

prematurity

OR (95% CI)

aOR (95% CI)

n (%)

1.33 (0.61, 2.91)

1.39 (0.62, 3.13)

10 (2.11)

1.67 (0.91, 3.07)

1.90 (0.99, 3.58)

19 (1.36)

1.66 (0.89, 3.11)

1.73 (0.91, 3.30)

15 (1.31)

0.88 (0.37, 2.11)

0.93 (0.38, 2.30)

7 (1.47)

Early onset sepsis

OR (95% CI)

aOR (95% CI)

n (%)

1.11 (0.49, 2.51)

1.04 (0.44, 2.43)

116 (24.47)

0.71 (0.35, 1.42)

0.68 (0.33, 1.37)

259 (18.58)

0.68 (0.33, 1.42)

0.66 (0.31, 1.39)

205 (17.89)

0.77 (0.31, 1.92)

0.72 (0.28, 1.84)

91 (19.16)

Maternal chorioamnionitis b

OR (95% CI)

aOR (95% CI)

3.02 (2.19, 4.16)

3.11 (2.23, 4.35)

2.12 (1.61, 2.81)

2.01 (1.51, 2.67)

2.03 (1.52, 2.70)

1.96 (1.46, 2.63)

2.21 (1.61, 2.81)

2.25 (1.59, 4.35)

ACS, antenatal corticosteroids course; OR, Odds Ratio; PMA, postmenstrual age.

a adjusted for maternal age, gravidity (1 or > 1), parity (1 or > 1), gender, gestational age (<28 weeks, 28 - 29+6 weeks, or 30 - 33+6 weeks), birth

weight, modes of delivery (cesarean section or vaginal), inborn status (yes or no), multiple births (yes, or no), artificial reproductive technology

(yes or no), abortion history (yes or no), hypertensive disorder in pregnancy, chorioamnionitis (yes or no), premature rupture of membranes (yes

or no), and intrauterine growth restriction (yes or no).

b not adjusted chorioamnionitis (yes or no).


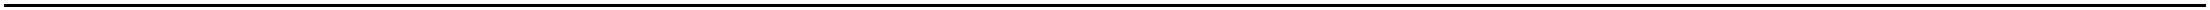


Supplement table 2. Differences in mortality and morbidity between very preterm infants born to diabetic mothers with and without ACS

exposure in the CHNN, 2019-2021, stratified by number of birth.

Singleton birth

Without ACS With ACS

Multiple births

Without ACS

exposure

With ACS

exposure

(N = 1237)

exposure

(n = 518)

exposure

(N = 2368)

(n = 214)

n (%)

156 (30.12)

reference

reference

59 (11.39)

reference

reference

111 (21.51)

reference

reference

24 (4.63)

reference

525 (22.17)

n (%)

66 (30.84)

reference

288 (23.28)

Mortality or any severe

morbidity

OR (95% CI)

aOR (95% CI)

n (%)

0.66 (0.54, 0.82)

0.65 (0.52, 0.82)

172 (7.26)

OR (95% CI)

0.68 (0.50, 0.94)

0.67 (0.47, 0.96)

110 (8.89)

aOR (95% CI) reference

n (%)

36 (16.82)

reference

Mortality in hospital

OR (95% CI)

aOR (95% CI)

n (%)

0.61 (0.45, 0.83)

0.62 (0.44, 0.88)

388 (16.47)

OR (95% CI)

0.48 (0.32, 0.73)

0.44 (0.27, 0.70)

219 (17.85)

aOR (95% CI) reference

n (%)

54 (25.35)

reference

Severe

bronchopulmonary

dysplasia

OR (95% CI)

aOR (95% CI)

n (%)

0.72 (0.57, 0.91)

0.72 (0.56, 0.94)

99 (4.18)

OR (95% CI)

0.64 (0.46, 0.90)

0.61 (0.41, 0.89)

59 (4.77)

aOR (95% CI) reference

n (%)

11 (5.14)

reference

Surgical necrotizing

enterocolitis

OR (95% CI)

0.90 (0.57, 1.42)

OR (95% CI)

0.92 (0.48, 1.79)


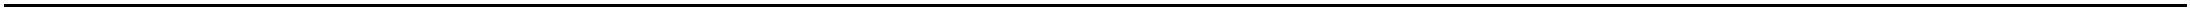

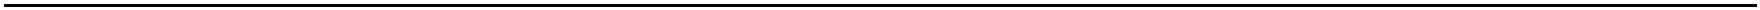

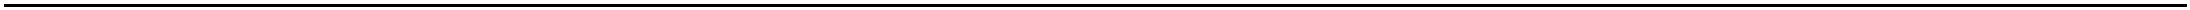


aOR (95% CI)

n (%)

reference

37 (7.14)

reference

reference

103 (18.13)

reference

reference

292 (56.37)

reference

reference

272 (52.51)

reference

reference

9 (1.74)

0.89 (0.55, 1.42)

99 (4.18)

aOR (95% CI) reference

1.00 (0.51, 1.96)

54 (4.37)

n (%)

4 (1.87)

Intraventricular

hemorrhage > II or

periventricular

leukomalacia

OR (95% CI)

aOR (95% CI)

n (%)

0.57 (0.38, 0.84)

0.60 (0.40, 0.90)

331 (12.92)

OR (95% CI)

reference

2.40 (0.86, 6.69)

2.93 (1.02, 8.40)

169 (12.55)

aOR (95% CI) reference

n (%)

31 (13.42)

reference

Low Apgar score

(1-minute ≤ 3 or 5-minute

7)

OR (95% CI)

aOR (95% CI)

n (%)

0.66 (0.52, 0.85)

0.68 (0.52, 0.89)

1206 (50.93)

OR (95% CI)

0.97 (0.63, 1.48)

1.04 (0.66, 1.63)

735 (59.42)

≤

aOR (95% CI) reference

n (%)

141 (65.89)

reference

Respiratory distress

syndrome

OR (95% CI)

aOR (95% CI)

n (%)

0.80 (0.66, 0.97)

0.84 (0.68, 1.03)

992 (41.89)

OR (95% CI)

0.76 (0.56, 1.03)

0.71 (0.51, 0.99)

554 (44.79)

aOR (95% CI) reference

n (%)

124 (57.94)

reference

Need invasive ventilation

in hospital

OR (95% CI)

aOR (95% CI)

n (%)

0.65 (0.54, 0.79)

0.64 (0.52, 0.78)

61 (2.58)

OR (95% CI)

0.59 (0.44, 0.79)

0.52 (0.38, 0.72)

42 (3.40)

aOR (95% CI) reference

n (%)

5 (2.34)

Treated retinopathy of

prematurity

OR (95% CI)

aOR (95% CI)

reference

reference

1.50 (0.74, 3.03)

1.58 (0.76, 3.28)

OR (95% CI)

reference

1.47 (0.58, 3.76)

1.68 (0.63, 4.46)

aOR (95% CI) reference

n (%)

6 (1.16)

38 (1.60)

n (%)

8 (3.74)

16 (1.29)

Early onset sepsis

OR (95% CI)

aOR (95% CI)

n (%)

reference

reference

49 (9.46)

reference

reference

1.39 (0.59, 3.31)

1.21 (0.50, 2.90)

477 (20.14)

OR (95% CI)

reference

0.34 (0.14, 0.80)

0.32 (0.13, 0.80)

291 (16.25)

aOR (95% CI) reference

n (%)

22 (10.28)

reference

Maternal

chorioamnionitis b

OR (95% CI)

aOR (95% CI)

2.41 (1.77, 3.30)

2.29 (1.67, 3.16)

OR (95% CI)

1.69(1.06, 2.70)

1.65 (1.02, 2.66)

aOR (95% CI) reference

ACS, antenatal corticosteroids course; OR, Odds Ratio; PMA, postmenstrual age.

a adjusted for maternal age, gravidity (1 or > 1), parity (1 or > 1), gender, gestational age (<28 weeks, 28 - 29+6 weeks, or 30 - 33+6 weeks), birth

weight, modes of delivery (cesarean section or vaginal), inborn status (yes or no), artificial reproductive technology (yes or no), abortion history

(yes or no), hypertensive disorder in pregnancy, chorioamnionitis (yes or no), premature rupture of membranes (yes or no), and intrauterine

growth restriction (yes or no).

b not adjusted chorioamnionitis (yes or no).


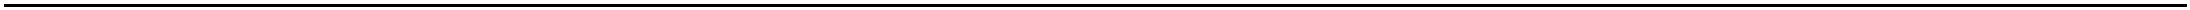


Supplement table 3. Differences in mortality and morbidity between very preterm infants born to diabetic mothers with and without ACS

exposure in the CHNN, 2019-2021, stratified by gestational age.

<

28 gestation weeks

28 - 29+6 gestation weeks

Without ACS With ACS

30 - 31+6 gestation weeks

Without ACS With ACS

Without ACS With ACS

exposure

(n = 128)

exposure

(N = 600)

exposure

(n = 243)

exposure

(N = 1218)

exposure

(n = 361)

exposure

(N = 1787)

n (%)

86 (67.19)

reference

373 (62.17)

123 (50.62)

478 (39.24)

103 (28.53)

410 (22.94)

Mortality or any

severe morbidity

OR (95% CI)

0.65 (0.45, 0.96) reference

0.69 (0.46, 1.04) reference

0.63 (0.47, 0.86) reference

0.64 (0.47, 0.88) reference

0.68 (0.51, 0.91)

0.63 (0.47, 0.86)

64 (3.58)

aOR (95% CI) reference

n (%)

51 (39.84)

reference

122 (20.33)

29 (11.93)

96 (7.88)

15 (4.16)

Mortality in

hospital

OR (95% CI)

0.39 (0.26, 0.58) reference

0.36 (0.23, 0.57) reference

0.63 (0.41, 0.98) reference

0.62 (0.38, 1.00) reference

0.86 (0.48, 1.52)

0.84 (0.44, 1.60)

174 (9.75)

aOR (95% CI) reference

n (%)

65 (51.59)

reference

229 (38.88)

58 (23.97)

204 (16.86)

42 (11.60)

Severe

bronchopulmonar OR (95% CI)

y dysplasia

0.60 (0.41, 0.88) reference

0.62 (0.41, 0.93) reference

0.64 (0.46, 0.90) reference

0.63 (0.46, 0.90) reference

0.82 (0.57, 1.17)

0.76 (0.52, 1.11)

14 (0.78)

aOR (95% CI) reference

Surgical

n (%)

3 (2.34)

10 (1.67)

8 (3.29)

22 1.81)

6 (1.66)

necrotizing

enterocolitis

OR (95% CI)

reference

0.71 (0.19, 2.60) reference

0.54 (0.24, 1.23) reference

0.47 (0.18, 1.22)


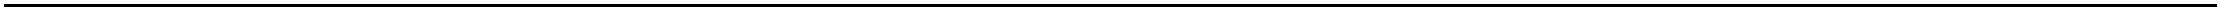

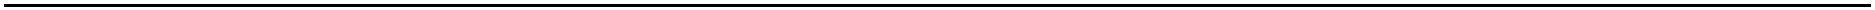

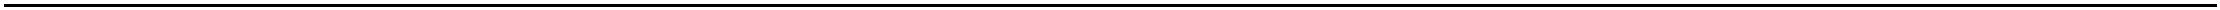


aOR (95% CI) reference

0.86 (0.21, 3.47) reference

58 (9.67) 12 (4.94)

0.54 (0.23, 1.26) reference

55 (4.52) 15 (4.16)

0.48 (0.18, 1.27)

40 (2.24)

n (%)

14 (10.94)

reference

Intraventricular

hemorrhage > II

or periventricular

leukomalacia

OR (95% CI)

0.87 (0.47, 1.62) reference

0.93 (0.49, 1.76) reference

0.91 (0.48, 1.73) reference

1.03 (0.54, 1.98) reference

0.53 (0.30, 0.97)

0.57 (0.30, 1.06)

132 (7.39)

aOR (95% CI) reference

n (%)

45 (35.16)

reference

183 (30.50)

41 (16.87)

175 (14.37)

44 (12.19)

Low Apgar score

(1-minute ≤ 3 or

OR (95% CI)

0.81 (0.54, 1.21) reference

0.94 (0.61, 1.44) reference

0.83 (0.57, 1.20) reference

0.91 (0.62, 1.34) reference

0.58 (0.40, 0.83)

0.55 (0.38, 0.81)

713 (39.90)

5

-minute ≤ 7)

aOR (95% CI) reference

n (%)

93 (72.66)

reference

464 (77.33)

158 (65.02)

764 (62.73)

182 (50.42)

Respiratory distress

syndrome

OR (95% CI)

1.28 (0.83, 1.98) reference

1.43 (0.90, 2.28) reference

0.90 (0.68, 1.21) reference

0.91 (0.67, 1.23) reference

0.65 (0.52, 0.82)

0.62 (0.49, 0.79)

514 (28.76)

aOR (95% CI) reference

n (%)

106 (82.81)

reference

428 (71.33)

146 (60.08)

604 (49.59)

144 (39.89)

Need invasive

ventilation in

hospital

OR (95% CI)

0.52 (0.32, 0.85) reference

0.51 (0.30, 0.85) reference

0.65 (0.49, 0.87) reference

0.64 (0.48, 0.86) reference

0.61 (0.48, 0.77)

0.59 (0.46, 0.75)

17 (0.95)

aOR (95% CI) reference

n (%)

8 (6.25)

52 (8.67)

3 (1.23)

34 (2.79)

3 (0.83)

Treated retinopathy

of prematurity

OR (95% CI)

reference

1.42 (0.66, 3.07) reference

1.57 (0.70, 3.51) reference

2.30 (0.70, 7.54) reference

2.63 (0.79, 8.83) reference

1.14 (0.33, 3.93)

0.99 (0.28, 3.51)

aOR (95% CI) reference

n (%)

6 (4.69)

17 (2.83)

3 (1.23)

25 （2.05)

5 (1.39)

12 (0.67)

Early onset sepsis

OR (95% CI)

reference

0.59 (0.23, 1.54) reference

0.61 (0.23, 1.63) reference

1.68 (0.52, 5.60) reference

1.51 (0.45, 5.11) reference

0.48 (0.17, 1.38)

0.45 (0.16, 1.33)

256 (14.33)

aOR (95% CI) reference

n (%)

20 (15.63)

reference

166 (27.67)

20 (8.23)

256 (21.02)

31 (8.59)

Maternal

chorioamnionitis b

OR (95% CI)

2.07 (1.24, 3.44) reference

2.01(1.18, 3.40) reference

2.97 (1.84, 4.78) reference

2.84 (1.74, 4.63) reference

1.78 (1.20, 2.63)

1.82 (1.22, 2.70)

aOR (95% CI) reference

ACS, antenatal corticosteroids course; OR, Odds Ratio; PMA, postmenstrual age.

a adjusted for maternal age, gravidity (1 or > 1), parity (1 or > 1), infantile gender, birth weight, modes of delivery (cesarean section or vaginal),

inborn status (yes or no), multiple births (yes, or no), artificial reproductive technology (yes or no), abortion history (yes or no), hypertensive

disorder in pregnancy, chorioamnionitis (yes or no), premature rupture of membranes (yes or no), and intrauterine growth restriction (yes or no).

b not adjusted chorioamnionitis (yes or no).


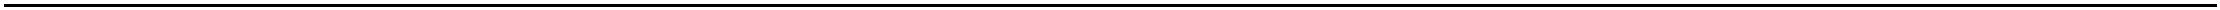


Supplement table 4. Differences in mortality and morbidity between very preterm infants born to diabetic mothers with and without antenatal

corticosteroids exposure in the CHNN, 2019-2021, stratified by birth weight.

<

1250 g

1250 - 1500 g

> 1500g

Without ACS With ACS

Without ACS With ACS

Without ACS With ACS

exposure

(n = 293)

exposure

(N = 1468)

exposure

(n = 209)

exposure

(N = 1134)

exposure

(n = 230)

exposure

(N = 1003)

n (%)

132 (45.05)

530 (36.10)

54 (25.84)

169 (14.90)

36 (15.65)

114 (11.37)

Mortality or any

severe morbidity

OR (95% CI) reference

aOR (95% CI) reference

0.69 (0.54, 0.89) reference

0.68 (0.52, 0.89) reference

0.50 (0.35, 0.71) reference

0.55 (0.38, 0.80) reference

0.69 (0.46, 1.04)

0.68 (0.45, 1.04)

30 (2.99)

n (%)

77 (24.57)

200 (13.62)

16 (7.66)

52 (4.59)

7 (3.04)

Mortality in

hospital

OR (95% CI) reference

aOR (95% CI) reference

0.48 (0.36, 0.66) reference

0.44 (0.32, 0.61) reference

0.58 (0.32, 1.04) reference

0.82 (0.40, 1.69) reference

0.98 (0.43, 2.27)

1.08 (0.43, 2.71)

174 (9.75)

n (%)

65 (51.59)

229 (38.88)

58 (23.97)

204 (16.86)

42 (11.60)

Severe

bronchopulmonar OR (95% CI) reference

y dysplasia

0.60 (0.41, 0.88) reference

0.62 (0.41, 0.93) reference

0.64 (0.46, 0.90) reference

0.63 (0.46, 0.90) reference

0.82 (0.57, 1.17)

0.76 (0.52, 1.11)

8 (0.80)

aOR (95% CI) reference

Surgical

n (%)

11 (3.75)

29 (1.98)

5 (2.39)

9 (0.79)

1 (0.43)

necrotizing

enterocolitis

OR (95% CI) reference

0.52 (0.26, 1.05) reference

0.33 (0.11, 0.98) reference

1.84 (0.23, 14.8)


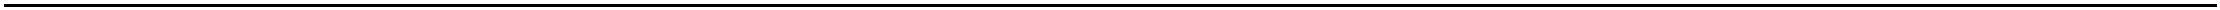

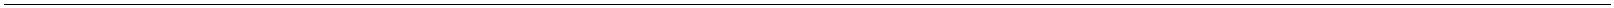

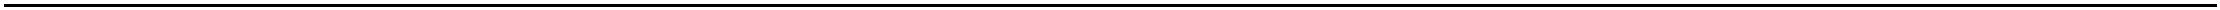


aOR (95% CI) reference

n (%) 20 (6.83)

0.57 (0.28, 1.18) reference

95 (6.47) 11 (5.26)

0.33 (0.11, 1.01) reference

35 (3.09) 10 (4.35)

2.20 (0.26, 18.5)

23 (2.29)

Intraventricular

hemorrhage > II

or periventricular

leukomalacia

OR (95% CI) reference

aOR (95% CI) reference

0.94 (0.57, 1.56) reference

0.99 (0.59, 1.65) reference

0.57 (0.29, 1.15) reference

0.60 (0.29, 1.23) reference

0.52 (0.24, 1.10)

0.48 (0.22, 1.06)

65 (6.48)

n (%)

69 (23.55)

320 (21.80)

37 (17.70)

105 (9.26)

24 (10.43)

Low Apgar score

(1-minute ≤ 3 or

OR (95% CI) reference

aOR (95% CI) reference

0.91 (0.67, 1.22) reference

0.96 (0.70, 1.31) reference

0.47 (0.32, 0.72) reference

0.51 (0.33, 0.79) reference

0.60 (0.36, 0.97)

0.63 (0.38, 1.05)

371 (36.99)

5

-minute ≤ 7)

n (%)

200 (68.26)

990 (67.44)

117 (55.98)

580 (51.15)

116 (50.43)

Respiratory distress

syndrome

OR (95% CI) reference

aOR (95% CI) reference

0.96 (0.74, 1.26) reference

0.98 (0.74, 1.29) reference

0.82 (0.61, 1.11) reference

0.80 (0.59, 1.10) reference

0.58 (0.43, 0.77)

0.59 (0.44, 0.79)

275 (27.42)

n (%)

209 (71.33)

860 (58.58)

100 (47.85)

411 (36.24)

87 (37.83)

Need invasive

ventilation in

hospital

OR (95% CI) reference

aOR (95% CI) reference

0.57 (0.43, 0.75) reference

0.56 (0.42, 0.74) reference

0.62 (0.46, 0.83) reference

0.64 (0.47, 0.87) reference

0.62 (0.46, 0.84)

0.63 (0.46, 0.85)

7 (0.70)

n (%)

10 (3.41)

80 (5.45)

2 (0.96)

16 (1.41)

2 (0.87)

Treated retinopathy

of prematurity

OR (95% CI) reference

aOR (95% CI) reference

1.63 (0.84, 3.19) reference

1.80 (0.91, 3.56) reference

1.48 (0.34, 6.49) reference

1.47 (0.32, 6.71) reference

0.80 (0.17, 3.88)

0.70 (0.14, 3.63)

n (%)

6 (2.05)

33 (2.25)

4 (1.91)

12 (1.06)

4 (1.74)

9 (0.90)

Early onset sepsis

OR (95% CI) reference

aOR (95% CI) reference

1.10 (0.46, 2.65) reference

1.09 (0.45, 2.67) reference

0.55 (0.18, 1.72) reference

0.49 (0.15, 1.58) reference

0.51 (0.16, 1.68)

0.44 (0.13, 1.55)

151 (15.05)

n (%)

29 (9.90)

271 (18.46)

14 (6.07)

191 (16.84)

23 (10.00)

Chorioamnionitis

OR (95% CI) reference

aOR (95% CI) reference

2.06 (1.37, 3.09) reference

1.97 (1.30, 3.00) reference

2.82 (1.60, 4.96) reference

2.73 (1.54, 4.84) reference

1.60 (1.00, 2.54)

1.56 (0.98, 2.50)

ACS, antenatal corticosteroids course; OR, Odds Ratio; PMA, postmenstrual age.

a adjusted for maternal age, gravidity (1 or > 1), parity (1 or > 1), gender, gestational age (<28 weeks, 28 - 29+6 weeks, or 30 - 33+6 weeks), birth

weight, modes of delivery (cesarean section or vaginal), inborn status (yes or no), multiple births (yes, or no), artificial reproductive technology

(yes or no), abortion history (yes or no), hypertensive disorder in pregnancy, chorioamnionitis (yes or no), premature rupture of membranes (yes

or no), and intrauterine growth restriction (yes or no).

b not adjusted chorioamnionitis (yes or no).


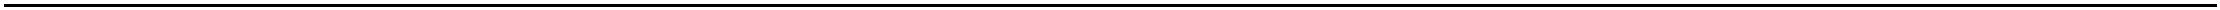


Supplement table 5. Differences in mortality and morbidity between very preterm infants born to diabetic mothers with and without antenatal

corticosteroids exposure in the CHNN, 2019-2021, stratified by infantile gender.

Male

With ACS

Female

Without ACS

exposure

Without ACS

exposure

With ACS

exposure

exposure

(n = 401)

(N = 2019)

(n = 331)

(N = 1586)

n (%)

117 (29.18)

reference

reference

47 (11.72)

reference

reference

88 (22.06)

reference

reference

11 (2.56)

reference

474 (23.48)

n (%)

105 (31.72)

reference

339 (21.37)

Mortality or any severe

morbidity

OR (95% CI)

aOR (95% CI)

n (%)

0.75 (0.59, 0.95)

0.74 (0.57, 0.96)

156 (7.72)

OR (95% CI)

0.59 (0.45, 0.76)

0.56 (0.42, 0.74)

135 (7.75)

aOR (95% CI) reference

n (%)

52 (14.05)

reference

Mortality in hospital

OR (95% CI)

aOR (95% CI)

n (%)

0.63 (0.45, 0.89)

0.59 (0.40, 0.88)

350 (17.45)

OR (95% CI)

0.51 (0.37, 0.72)

0.49 (0.33, 0.72)

257 (16.30)

aOR (95% CI) reference

n (%)

77 (23.33)

reference

Severe

bronchopulmonary

dysplasia

OR (95% CI)

aOR (95% CI)

n (%)

0.75 (0.57, 0.97)

0.74 (0.55, 0.99)

25 (1.15)

OR (95% CI)

0.64 (0.48, 0.85)

0.63 (0.45, 0.86)

23 (1.32)

aOR (95% CI) reference

n (%)

7 (1.89)

Surgical necrotizing

enterocolitis

OR (95% CI)

0.44 (0.22, 0.91)

OR (95% CI)

reference

0.69 (0.30, 1.63)


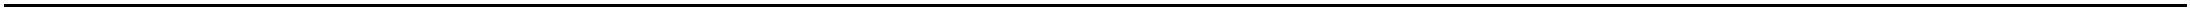

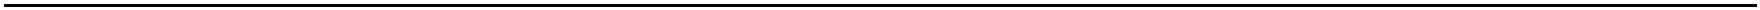

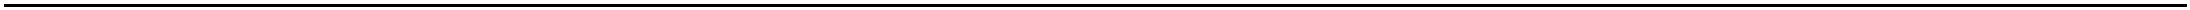


aOR (95% CI)

n (%)

reference

24 (5.59)

reference

reference

68 (15.85)

reference

reference

258 (64.14)

reference

reference

237 (55.24)

reference

reference

7 (1.63)

0.50 (0.24, 1.06)

95 (4.39)

aOR (95% CI) reference

0.66 (0.27, 1.59)

66 (3.79)

n (%)

17 (4.59)

reference

Intraventricular

hemorrhage > II or

periventricular

leukomalacia

OR (95% CI)

aOR (95% CI)

n (%)

0.77 (0.49, 1.23)

0.79 (0.49, 1.27)

273 (12.60)

OR (95% CI)

0.82 (0.47, 1.41)

0.87 (0.50, 1.52)

227 (10.03)

aOR (95% CI) reference

n (%)

66 (17.84)

reference

Low Apgar score

(1-minute ≤ 3 or 5-minute

7)

OR (95% CI)

aOR (95% CI)

n (%)

0.77 (0.57, 1.02)

0.81 (0.60, 1.11)

1127 (52.03)

OR (95% CI)

0.69 (0.51, 0.93)

0.71 (0.52, 0.99)

888 (50.98)

≤

aOR (95% CI) reference

n (%)

191 (51.62)

reference

Respiratory distress

syndrome

OR (95% CI)

aOR (95% CI)

n (%)

0.72 (0.58, 0.89)

0.71 (0.57, 0.90)

907 (41.87)

OR (95% CI)

0.97 (0.78, 1.22)

0.93 (0.73, 1.18)

699 (40.13)

aOR (95% CI) reference

n (%)

175 (47.30)

reference

Need invasive ventilation

in hospital

OR (95% CI)

aOR (95% CI)

n (%)

0.58 (0.47, 0.72)

0.56 (0.45, 0.70)

51 (2.35)

OR (95% CI)

0.75 (0.60, 0.94)

0.67 (0.52, 0.86)

53 (3.04)

aOR (95% CI) reference

n (%)

7 (1.89)

Treated retinopathy of

prematurity

OR (95% CI)

aOR (95% CI)

reference

reference

1.45 (0.66, 3.23)

1.50 (0.66, 3.44)

OR (95% CI)

reference

1.63 (0.73, 3.61)

1.67 (0.73, 3.80)

aOR (95% CI) reference

n (%)

8 (1.86)

29 (1.34)

n (%)

7 (1.89)

30 (1.72)

Early onset sepsis

OR (95% CI)

aOR (95% CI)

n (%)

reference

reference

28 (6.98)

reference

reference

0.71 (0.32, 1.57)

0.61 (0.27, 1.38)

356 (17.63)

OR (95% CI)

reference

0.91 (0.40, 2.09)

0.93 (0.40, 2.18)

257 (16.20)

aOR (95% CI) reference

n (%)

38 (11.48)

reference

Maternal

chorioamnionitis

OR (95% CI)

aOR (95% CI)

2.85 (1.91, 4.26)

2.75 (1.82, 4.13)

OR (95% CI)

1.49 (1.04, 2.14)

1.51 (1.04, 2.19)

aOR (95% CI) reference

ACS, antenatal corticosteroids course; OR, Odds Ratio; PMA, postmenstrual age.

a adjusted for maternal age, gravidity (1 or > 1), parity (1 or > 1), gestational age (<28 weeks, 28 - 29+6 weeks, or 30 - 33+6 weeks), birth weight,

modes of delivery (cesarean section or vaginal), inborn status (yes or no), multiple births (yes, or no), artificial reproductive technology (yes or

no), abortion history (yes or no), hypertensive disorder in pregnancy, chorioamnionitis (yes or no), premature rupture of membranes (yes or no),

and intrauterine growth restriction (yes or no).

b not adjusted chorioamnionitis (yes or no).


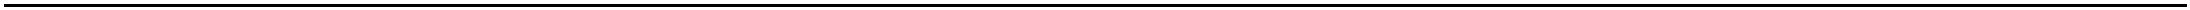


Supplement table 6. Differences in mortality and morbidity between very preterm

infants born to diabetic mothers with and without ACS exposure in the CHNN,

2

019-2021, sensitive analysis by propensity score matching.

Without ACS

With ACS

exposure

(N = 1430)

exposure

(n = 729)

n (%)

222 (30.41)

reference

95 (13.03)

reference

165 (22.70)

reference

17 (2.33)

reference

40 (5.49)

305 (21.32)

Mortality or any severe

morbidity

OR (95% CI)

n (%)

0.63 (0.51, 0.77)

111 (7.76)

Mortality in hospital

OR (95% CI)

n (%)

0.57 (0.43, 0.76)

241 (16.86)

Severe bronchopulmonary

dysplasia

OR (95% CI)

n (%)

0.69 (0.55, 0.86)

16 (1.12)

Surgical necrotizing

enterocolitis

OR (95% CI)

n (%)

0.50 (0.25, 0.99)

74 (5.17)

Intraventricular

hemorrhage > II or

periventricular

OR (95% CI)

reference

0.93 (0.62, 1.38)

leukomalacia

Low Apgar score (1-minute ≤

n (%)

129 (17.70)

reference

431 (59.12)

reference

394 (54.55)

reference

14 (1.92)

reference

14 (1.92)

reference

66 (9.04)

reference

226 (15.80)

3

or 5-minute ≤ 7)

OR (95% CI)

n (%)

0.88 (0.70, 1.11)

784 (54.83)

Respiratory distress syndrome

OR (95% CI)

n (%)

0.84 (0.70, 1.00)

626 (43.78)

Need invasive ventilation in

hospital

OR (95% CI)

n (%)

0.67 (0.56, 0.80)

38 (2.66)

Treated retinopathy of

prematurity

OR (95% CI)

n (%)

1.36 (0.74, 2.51)

11 (0.77)

Early onset sepsis

OR (95% CI)

n (%)

0.40 (0.18, 0.89)

150 (10.52)

Maternal chorioamnionitis

OR (95% CI)

1.31 (0.87, 1.98)

ACS, antenatal corticosteroids course; OR, Odds Ratio; PMA, postmenstrual age.

Supplement table 7. Differences in mortality and morbidity between preterm infants


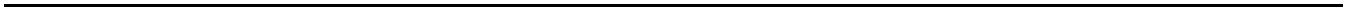

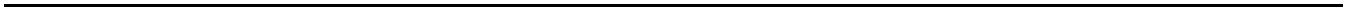

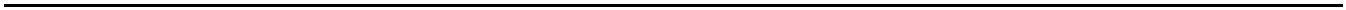


born to gestational diabetes mellitus with and without antenatal corticosteroids

exposure in the CHNN, 2019-2021.

Without ACS

exposure

With ACS

exposure

(n = 689, ref)

(N = 3440)

n (%)

208 (30.19)

reference

762 (22.15)

Mortality or any severe

morbidity

OR (95% CI)

0.66 (0.55, 0.79)

0.64 (0.53, 0.78)

268 (7.79)

aOR (95% CI) reference

n (%)

88 (12.77)

reference

Mortality in hospital

OR (95% CI)

0.58 (0.45, 0.75)

0.56 (0.42, 0.75)

572 (16.73)

aOR (95% CI) reference

n (%)

153 (22.30)

reference

Severe

bronchopulmonary

dysplasia

OR (95% CI)

0.70 (0.57, 0.86)

0.69 (0.55, 0.86)

44 (1.28)

aOR (95% CI) reference

n (%)

17 (2.47)

reference

Surgical necrotizing

enterocolitis

OR (95% CI)

0.51 (0.29, 0.90)

0.53 (0.30, 0.95)

144 (4.19)

aOR (95% CI) reference

n (%)

38 (5.52)

reference

Intraventricular

hemorrhage > II or

periventricular

leukomalacia

OR (95% CI)

0.75 (0.52, 1.08)

0.83 (0.57, 1.20)

461 (13.40)

aOR (95% CI) reference

n (%)

118(17.13)

reference

Low Apgar score

(1-minute ≤ 3 or

OR (95% CI)

0.75 (0.60, 0.93)

0.78 (0.61, 0.99)

1837 (53.40)

5

-minute ≤ 7)

aOR (95% CI) reference

n (%)

411 (59.65)

reference

Respiratory distress

syndrome

OR (95% CI)

0.78 (0.66, 0.92)

0.76 (0.64, 0.91)

1465 (42.59)

aOR (95% CI) reference

n (%)

371 (53.85)

reference

Need invasive

ventilation in hospital

OR (95% CI)

0.64 (0.54, 0.75)

0.60 (0.50, 0.72)

aOR (95% CI) reference


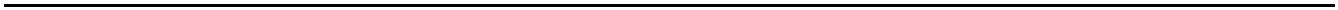

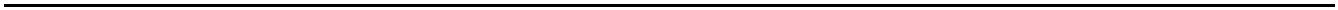


n (%)

14 (2.03)

98 (2.85)

Treated retinopathy of

prematurity

OR (95% CI)

reference

1.41 (0.80, 2.49)

1.52 (0.85, 2.72)

53 (1.54)

aOR (95% CI) reference

n (%)

14 (2.03)

reference

Early onset sepsis

OR (95% CI)

0.75 (0.42, 1.37)

0.69 (0.38, 1.27)

573 (16.66)

aOR (95% CI) reference

n (%)

59 (8.56)

reference

Maternal

chorioamnionitis

OR (95% CI)

2.13 (1.61, 2.83)

2.08 (1.56, 2.77)

aOR (95% CI) reference

ACS, antenatal corticosteroids course; OR, Odds Ratio; PMA, postmenstrual age.

a adjusted for maternal age, gravidity (1 or > 1), parity (1 or > 1), gender, gestational

age (<28 weeks, 28 - 29+6 weeks, or 30 - 33+6 weeks), birth weight, modes of delivery

(cesarean section or vaginal), inborn status (yes or no), multiple births (yes, or no),

artificial reproductive technology (yes or no), abortion history (yes or no),

hypertensive disorder in pregnancy, chorioamnionitis (yes or no), premature rupture

of membranes (yes or no), and intrauterine growth restriction (yes or no).

b not adjusted chorioamnionitis (yes or no).


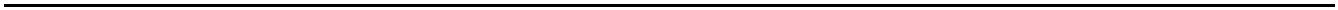


Supplement table 8. Differences in mortality and morbidity between very preterm

infants born to diabetic mothers with and without ACS exposure in the CHNN, 2019 -

2

021, sensitive analysis in inborn infants.

Without ACS

exposure

With ACS

exposure

(N = 557, ref)

(N =3050)

n (%)

162 (29.08)

reference

reference

74 (13.29)

reference

reference

124 (22.38)

reference

reference

14 (2.51)

reference

reference

37 (6.51)

reference

reference

87 (15.62)

reference

reference

343 (61.58)

reference

reference

279 (50.09)

reference

654 (21.44)

Mortality or any

severe morbidity

OR (95% CI)

aOR (95% CI)

n (%)

0.67 (0.54, 0.82)

0.65 (0.52, 0.81)

242 (7.93)

Mortality in

hospital

OR (95% CI)

aOR (95% CI)

n (%)

0.56 (0.43, 0.74)

0.54 (0.39, 0.74)

495 (16.33)

Severe

bronchopulmonary OR (95% CI)

dysplasia

0.68 (0.54, 0.84)

0.65 (0.51, 0.84)

37 (1.21)

aOR (95% CI)

n (%)

Surgical

necrotizing

enterocolitis

OR (95% CI)

aOR (95% CI)

n (%)

0.48 (0.26, 0.89)

0.50 (0.27, 0.95)

104 (4.06)

Intraventricular

hemorrhage > II or

periventricular

leukomalacia

OR (95% CI)

aOR (95% CI)

n (%)

0.61 (0.41, 0.89)

0.64 (0.43, 0.96)

375 (12.30)

Low Apgar score

(1-minute ≤ 3 or

OR (95% CI)

aOR (95% CI)

n (%)

0.76 (0.59, 0.98)

0.79 (0.60, 1.04)

1649 (54.07)

5

-minute ≤ 7)

Respiratory distress

syndrome

OR (95% CI)

aOR (95% CI)

n (%)

0.73 (0.61, 0.88)

0.72 (0.59, 0.87)

1229 (40.30)

Need invasive

ventilation in

hospital

OR (95% CI)

0.67 (0.56, 0.81)


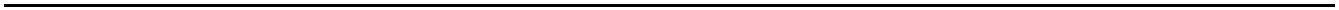

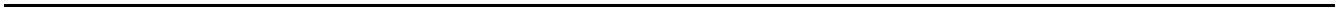


aOR (95% CI)

n (%)

reference

13 (2.33)

reference

reference

10 (1.80)

reference

reference

66 (11.85)

reference

reference

0.63 (0.52, 0.77)

81 (2.66)

Treated retinopathy

of prematurity

OR (95% CI)

aOR (95% CI)

n (%)

1.14 (0.63, 2.07)

1.26 (0.68, 2.34)

44 (1.44)

Early onset sepsis

OR (95% CI)

aOR (95% CI)

n (%)

0.80 (0.40, 1.60)

0.78 (0.39, 1.58)

605 (19.84)

Maternal

chorioamnionitis

OR (95% CI)

aOR (95% CI)

1.84 (1.40, 2.42)

1.82 (1.37, 2.40)

ACS, antenatal corticosteroids course; OR, Odds Ratio; PMA, postmenstrual age.

a adjusted for maternal age, gravidity (1 or > 1), parity (1 or > 1), gender, gestational

age (<28 weeks, 28 - 29+6 weeks, or 30 - 33+6 weeks), birth weight, modes of delivery

(cesarean section or vaginal), inborn status (yes or no), multiple births (yes, or no),

artificial reproductive technology (yes or no), abortion history (yes or no),

hypertensive disorder in pregnancy, chorioamnionitis (yes or no), premature rupture

of membranes (yes or no), and intrauterine growth restriction (yes or no).

b not adjusted chorioamnionitis (yes or no).


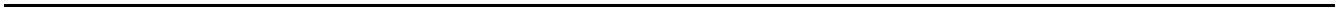

Supplement: Supplementary file 1 [file ee3c681754a812ccf8f7e503.docx]
